# Supplementary material
Source: publisher figshare collection journal article supplement (https://acs.figshare.com/ndownloader/files/17079725)
Supplement: Supplementary file 1 [file 17079725]

Compound_ID	SMILES	IC50 PaAccC (nM)
1	BrC(C=CC=C1Br)=C1C(C(N)=N2)=CC3=C2N=C(N)N=C3	180
4a	ClC(C=CC=C1Cl)=C1C(C(N)=N2)=CC3=C2N=C(N)N=C3	320
4b	NC1=NC=C(C=C(C2=CC=CC=C2C3=CC=CC=C3)C(N)=N4)C4=N1	79
4c	NC1=NC=C(C=C(C2=CC=CC=C2C3=CC=CN=C3)C(N)=N4)C4=N1	130
4d	NC[0]=NC=C(C=C(C[13]()=C(C[20]=CC=CN=C@20)C=CC=C@13Cl)C(N)=N[9])C@10=N@1	36
4e	NC1=NC=C(C=C(C2=C(C3=CC=C(OC)N=C3)C=CC=C2Cl)C(N)=N4)C4=N1	32
4f	NC1=NC2=NC(N)=NC=C2C=C1C3=C(OCC(C)C)C=CC=C3Cl	93
12a	O=C(C1CN(C2=NC3=NC(N)=NC=C3C=C2C4=C(Cl)C=CC=C4Cl)CC1)N	170
12b	OCC1CN(C2=NC3=NC(N)=NC=C3C=C2C4=C(Cl)C=CC=C4Cl)CC1	140
13c	OCC1(N)CN(C2=NC3=NC(N)=NC=C3C=C2C4=C(Cl)C=CC=C4Cl)CC1	190
13d	NC1=NC=C(C=C(C2=C(Cl)C=CC=C2Cl)C(N3CC(F)(CN)CC3)=N4)C4=N1	440
13e	OC1(CN)CN(C2=NC3=NC(N)=NC=C3C=C2C4=C(Cl)C=CC=C4Cl)CC1	83
13f	NC1=NC=C(C=C(C2=C(Cl)C=CC=C2Cl)C(N3CC(CN)CC3)=N4)C4=N1	64
13g	NC1=NC=C(C=C(C2=C(Cl)C=CC=C2Cl)C(N3CCC(CN)CC3)=N4)C4=N1	320
13h	ClC(C=CC=C1Cl)=C1C(C(N2C[C@@H]([C@@H]3N)[C@@H]3C2)=N4)=CC5=C4N=C(N)N=C5	33
14a	NC1=NC2=C(C=C(C3=C(C4=CC=CN=C4)C=CC=C3Cl)C(N5C[C@]([C@@H]6N)([H])[C@]6([H])C5)=N2)C=N1	²15
14b	NC1=NC2=C(C=C(C3=C(C4=CC=NC=C4)C=CC=C3Cl)C(N5C[C@]([C@@H]6N)([H])[C@]6([H])C5)=N2)C=N1	²15
14c	NC1=NC2=C(C=C(C3=C(C4=CC(F)=C(OC)N=C4)C=CC=C3Cl)C(N5C[C@]([C@@H]6N)([H])[C@]6([H])C5)=N2)C=N1	²15
14d	NC1=NC2=C(C=C(C3=C(C4=CN=C(C)S4)C=CC=C3Cl)C(N5C[C@]([C@@H]6N)([H])[C@]6([H])C5)=N2)C=N1	²15
14e	N[C@@H]1[C@H]2CN(C3=NC4=NC(N)=NC=C4C=C3C5=C(Cl)C=CC=C5OCC(C)C)C[C@@H]12	²15
